# Supplementary material for: The role of vascularization in nerve regeneration of nerve graft
Source: PubMed Central journal article supplement — Neural Regen Res. 2020 Feb 28;15(9):1573–9. doi: 10.4103/1673-5374.276327 (PMC7437604; doi:10.4103/1673-5374.276327), 2020-02-28
Supplement: NRR-15-1573_Suppl1.pdf [file NRR-15-1573_Suppl1.pdf]

## OPEN PEER REVIEW REPORT 1

**Name of journal:** Neural Regeneration Research

**Manuscript NO:** NRR-D-19-00671

**Title:** The role of vascularization in nerve regeneration

**Reviewer's Name:** Konstantin D. Bergmeister

**Reviewer's country:** Germany

**Date sent for review:** 2019-11-22

### COMMENTS TO AUTHORS

This review summarizes the available evidence on vascularized nerve grafts for surgical nerve reconstruction. This is a very interesting topic that has been debated for many years. Whilst it is not commonly used in surgical practice as the best of my knowledge, it would if surgically possible, perhaps help to overcome the current limitations of nerve regeneration. The manuscript is written in a very well manner including illustrative figures and detailed descriptions on the involved mechanisms. Overall the manuscript is publishable as it is. I don't see any need for additional improvements.
