# Supplementary material for: The role of vascularization in nerve regeneration of nerve graft
Source: PubMed Central journal article supplement — Neural Regen Res. 2020 Feb 28;15(9):1573–9. doi: 10.4103/1673-5374.276327 (PMC7437604; doi:10.4103/1673-5374.276327), 2020-02-28
Supplement: NRR-15-1573_Suppl2.pdf [file NRR-15-1573_Suppl2.pdf]

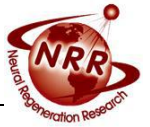

## OPEN PEER REVIEW REPORT 2

**Name of journal:** Neural Regeneration Research

**Manuscript NO:** NRR-D-19-00671

**Title:** The role of vascularization in nerve regeneration

**Reviewer's Name:** Xin Zhao

**Reviewer's country:** China

**Date sent for review:** 2019-11-22

### COMMENTS TO AUTHORS

1. Most papers reviewed are related to nerve graft. It is suggested to add "... of nerve graft" in the title.
2. Vascularization is much important in some situations, such as nerve graft in long length or large diameter. But up to now these situations are still not the appropriate indications for applying artificial nerve graft. What's the author's consideration on this point?
